# Supplementary material
Source: PubMed Central journal article supplement (PMC2725504)
Supplement: supp_75_15_5111__1.pdf [file supp_75_15_5111__1.pdf]

TABLE S1B. Relative abundances of sub-phyla determined in the same manner as for Table S1A. Numbers in bold represent the sum of sequences within each of the phylum (identical to those shown in Table S1A). Asterisks indicate sequences classified to the phylum level only.

| Group                            | Total       | <4.0        | 4to5        | 5to6        | 6to7        | 7to8        | >8.0        |
|----------------------------------|-------------|-------------|-------------|-------------|-------------|-------------|-------------|
| <i>Acidobacteria</i>             | <b>30.9</b> | <b>63.2</b> | <b>50.2</b> | <b>29.7</b> | <b>19.1</b> | <b>20.3</b> | <b>15.8</b> |
| <i>Gp1</i>                       | 9.27        | 26.2        | 21.3        | 10.7        | 2.18        | 0.18        | 0.02        |
| <i>Gp2</i>                       | 6.22        | 25.4        | 14.6        | 5.48        | 0.37        | 0.12        | 0.01        |
| <i>Gp4</i>                       | 5.82        | 0.01        | 0.37        | 3.62        | 8.51        | 12.4        | 9.64        |
| <i>Gp3</i>                       | 4.78        | 8.77        | 10.0        | 5.06        | 2.69        | 1.32        | 1.46        |
| <i>Gp6</i>                       | 2.41        | 0.76        | 1.21        | 2.37        | 2.95        | 3.89        | 2.56        |
| <i>Other</i>                     | 2.42        | 2.01        | 2.75        | 2.50        | 2.40        | 2.38        | 2.06        |
| <i>Actinobacteria</i>            | <b>13.0</b> | <b>5.35</b> | <b>5.12</b> | <b>8.82</b> | <b>16.7</b> | <b>19.9</b> | <b>24.3</b> |
| <i>Actinobacteridae</i>          | 8.71        | 4.71        | 4.22        | 6.92        | 11.9        | 12.7        | 11.7        |
| <i>Rubrobacteridae</i>           | 3.54        | 0.20        | 0.52        | 1.19        | 3.98        | 6.12        | 11.6        |
| <i>Actinobacteria*</i>           | 0.70        | 0.44        | 0.37        | 0.69        | 0.80        | 0.94        | 0.94        |
| <i>Acidimicrobidae</i>           | 0.04        | 0.00        | 0.00        | 0.02        | 0.02        | 0.14        | 0.07        |
| <i>Bacteroidetes</i>             | <b>11.2</b> | <b>1.69</b> | <b>3.62</b> | <b>10.7</b> | <b>14.5</b> | <b>17.1</b> | <b>17.3</b> |
| <i>Sphingobacteria</i>           | 9.19        | 1.44        | 2.75        | 8.33        | 12.0        | 14.9        | 14.0        |
| <i>Bacteroidetes*</i>            | 1.40        | 0.23        | 0.74        | 1.39        | 1.50        | 1.60        | 2.79        |
| <i>Flavobacteria</i>             | 0.59        | 0.01        | 0.07        | 0.93        | 0.98        | 0.58        | 0.39        |
| <i>Bacteroidetes</i>             | 0.05        | 0.01        | 0.06        | 0.01        | 0.11        | 0.03        | 0.08        |
| <i>Alphaproteobacteria</i>       | <b>18.2</b> | <b>16.1</b> | <b>18.8</b> | <b>20.1</b> | <b>17.6</b> | <b>16.9</b> | <b>16.9</b> |
| <i>Rhizobiales</i>               | 11.2        | 9.36        | 12.3        | 12.4        | 11.0        | 9.86        | 9.84        |
| <i>Alphaproteobacteria*</i>      | 3.21        | 4.52        | 3.81        | 4.05        | 2.66        | 2.09        | 1.91        |
| <i>Rhodospirillales</i>          | 1.59        | 1.60        | 1.66        | 1.52        | 1.16        | 2.10        | 1.62        |
| <i>Sphingomonadales</i>          | 1.39        | 0.03        | 0.30        | 1.13        | 2.01        | 2.12        | 2.53        |
| <i>Caulobacterales</i>           | 0.65        | 0.59        | 0.71        | 0.95        | 0.58        | 0.47        | 0.26        |
| <i>Other</i>                     | 0.20        | 0.02        | 0.02        | 0.11        | 0.19        | 0.29        | 0.71        |
| <i>Beta/Gammaproteobacteria</i>  | <b>9.14</b> | <b>4.41</b> | <b>8.72</b> | <b>11.9</b> | <b>10.9</b> | <b>8.21</b> | <b>5.14</b> |
| <i>Burkholderiales</i>           | 4.95        | 2.44        | 4.52        | 6.44        | 6.29        | 4.01        | 3.02        |
| <i>Betaproteobacteria*</i>       | 1.56        | 0.60        | 1.72        | 2.18        | 1.83        | 1.22        | 0.57        |
| <i>Other Betaproteobacteria*</i> | 0.34        | 0.01        | 1.10        | 0.13        | 0.31        | 0.10        | 0.20        |
| <i>Gammaproteobacteria*</i>      | 1.02        | 0.78        | 0.80        | 0.96        | 1.04        | 1.53        | 0.91        |
| <i>Xanthomonadales</i>           | 0.62        | 0.22        | 0.22        | 1.23        | 0.74        | 0.47        | 0.12        |
| <i>Other Gammaproteobacteria</i> | 0.65        | 0.36        | 0.36        | 0.92        | 0.72        | 0.87        | 0.32        |

FIG. S1. Scatter plots of soil pH versus Faith's index of phylogenetic diversity for those phyla with significant regression coefficients (Table 2). Faith's index of phylogenetic diversity was calculated for individual phyla holding the number of sequences per sample constant (see Methods).

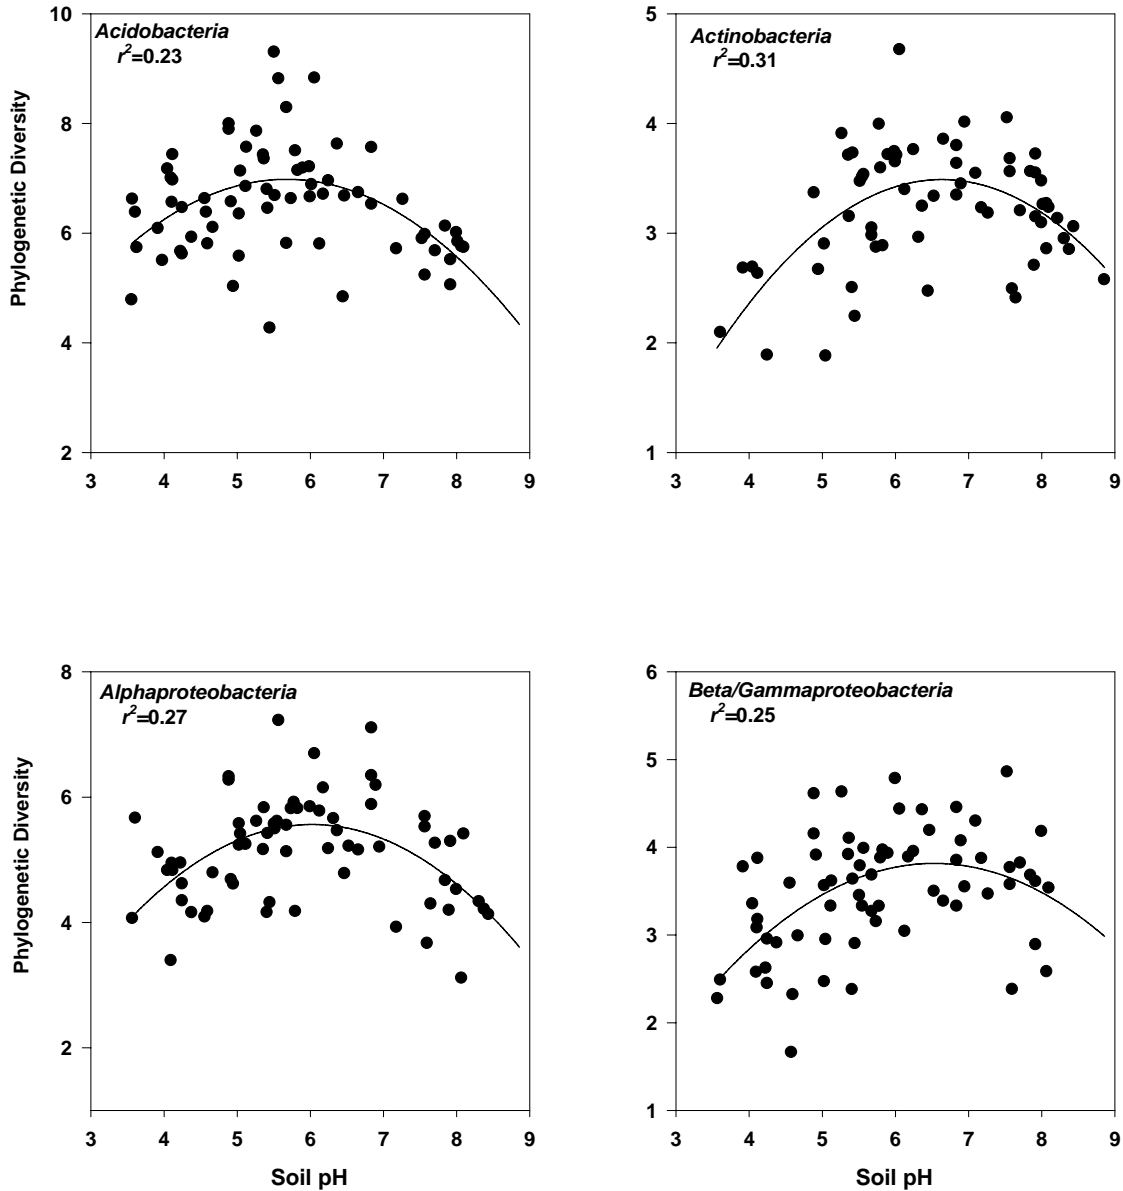

TABLE S2: Comparison of bacterial phyla with respect to the average number of phylotypes per soil and the average phylogenetic diversity (Faith's PD) per soil. The values were calculated from 100 randomly selected sequences per soil. Standard deviations of the mean are shown in parentheses.

| <b>Phylum</b>                   | <b>No. of phylotypes per soil</b> | <b>Average phylogenetic diversity per soil</b> |
|---------------------------------|-----------------------------------|------------------------------------------------|
| <i>Acidobacteria</i>            | 74.5 (7.2)                        | 3.7 (0.5)                                      |
| <i>Actinobacteria</i>           | 73.2 (7.3)                        | 3.2 (0.5)                                      |
| <i>Alphaproteobacteria</i>      | 71.4 (6.7)                        | 3.3 (0.5)                                      |
| <i>Beta/Gammaproteobacteria</i> | 66.7 (9.7)                        | 3.5 (0.7)                                      |
| <i>Bacteroidetes</i>            | 68.8 (10.0)                       | 3.6 (0.6)                                      |
